# Supplementary material for: Advancing interpretation of incoherent scattering in ice-penetrating radar data used for ice core site selection
Source: Copernicus journal article supplement (doi:10.5194/tc-19-3159-2025), 2025-08-21
Supplement: Supplementary file 1 [file tc-19-3159-2025-supplement.zip]

1 **Supplement to: Advancing interpretation of incoherent scattering in**  
2 **ice penetrating radar data used for ice core site selection**

3  
4 Ellen Mutter<sup>1</sup> and Nicholas Holschuh<sup>2</sup>

5 <sup>1</sup>Department of Earth and Atmospheric Sciences, Cornell University, Ithaca, NY, 14853, USA

6 <sup>2</sup>Department of Geology, Amherst College, Amherst, MA 01002, USA

7 *Correspondence to:* Nicholas Holschuh ([nholschuh@amherst.edu](mailto:nholschuh@amherst.edu))

8 Below, we provide four supplementary figures that provide the broader context that further justify interpretations of the radar  
9 data in the main text. Here, we also include the reference list for Tables S1 and S2.

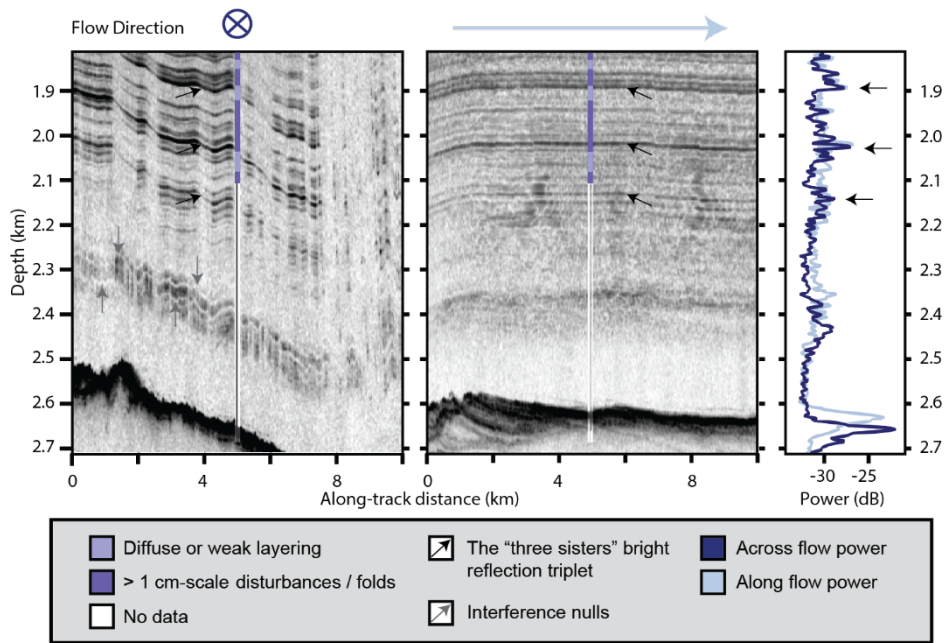

10  
11 **Figure S1: Across (left) and along (right) flow radar transects from near the EastGRIP ice core. Vertical colormap over**  
12 **the ice core drill site visualizes depths of transitions between diffuse/weak layering and layers with periodic cm-scale**  
13 **scale disturbances. Transitions between these layer types at 1900 m and 2030 m are roughly coincident with two of the**  
14 **“three sisters” bright reflection horizons while the third reflection “sister” is below the depths of published linescan**  
15 **images. Interference nulls are observed within the incoherent scattering unit in the across flow radargram but are**  
16 **absent from the along flow radargram.**

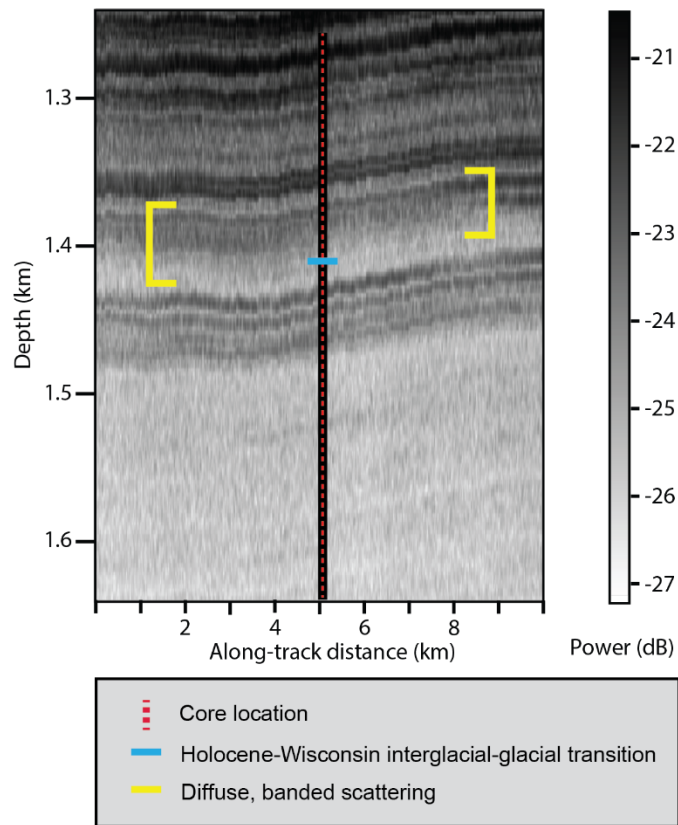

**Figure S2: NEEM radargram from depths spanning the Holocene-Wisconsin Interglacial-Glacial transition at 1419 m. The climactic transition is coincident with a transition from a weak vertical girdle c-axis fabric to a strong single maximum c-axis fabric and is collocated with a band of diffuse scattering in the radargram.**

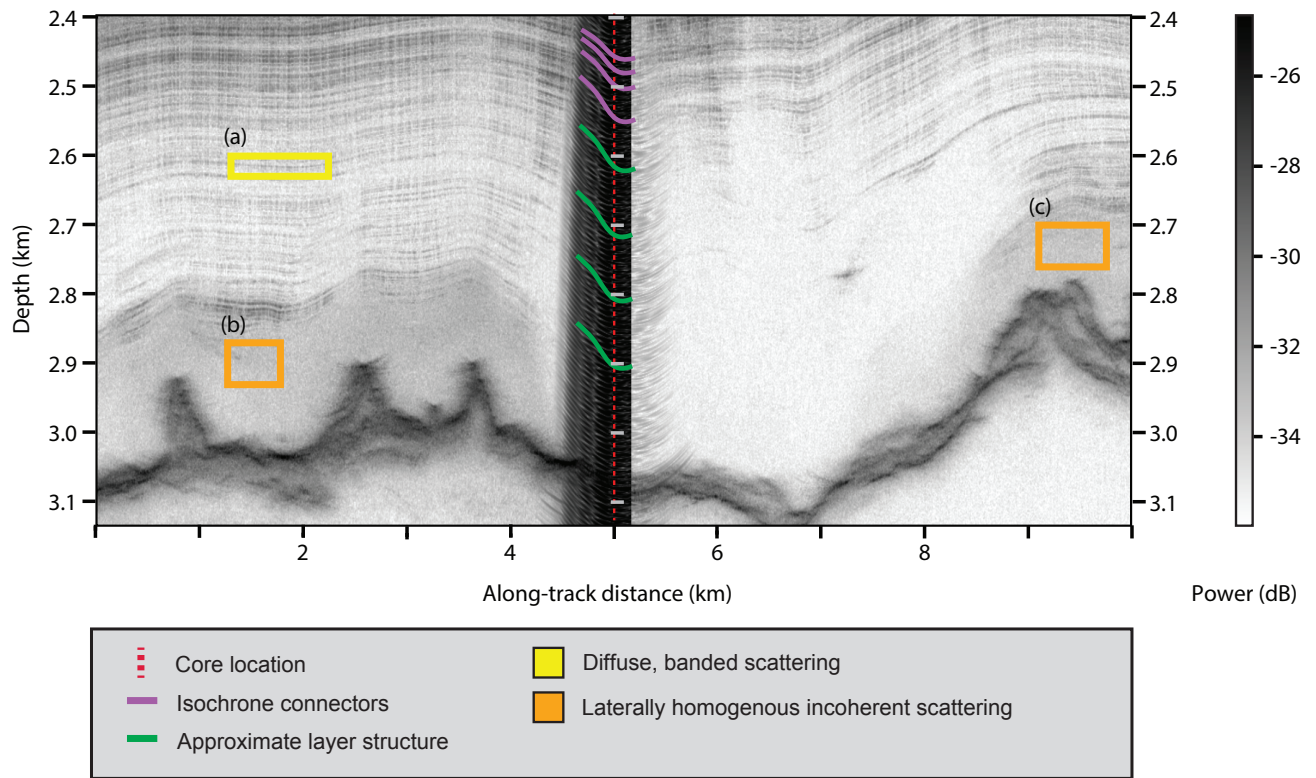

24

25

26

27

28

**Figure S3: Dome Fuji radargram with layer tracing across borehole (strong scattering at the ice drill core site is caused by borehole fluid in the ice core cavity). Examples of diffuse banded scattering (a) and laterally homogeneous incoherent scattering (b,c). The diffuse banded layer at (a) dips to ~2700 m at the core site and the onset of the homogenous incoherent scattering unit at (b) dips to ~2900 m at the core site.**

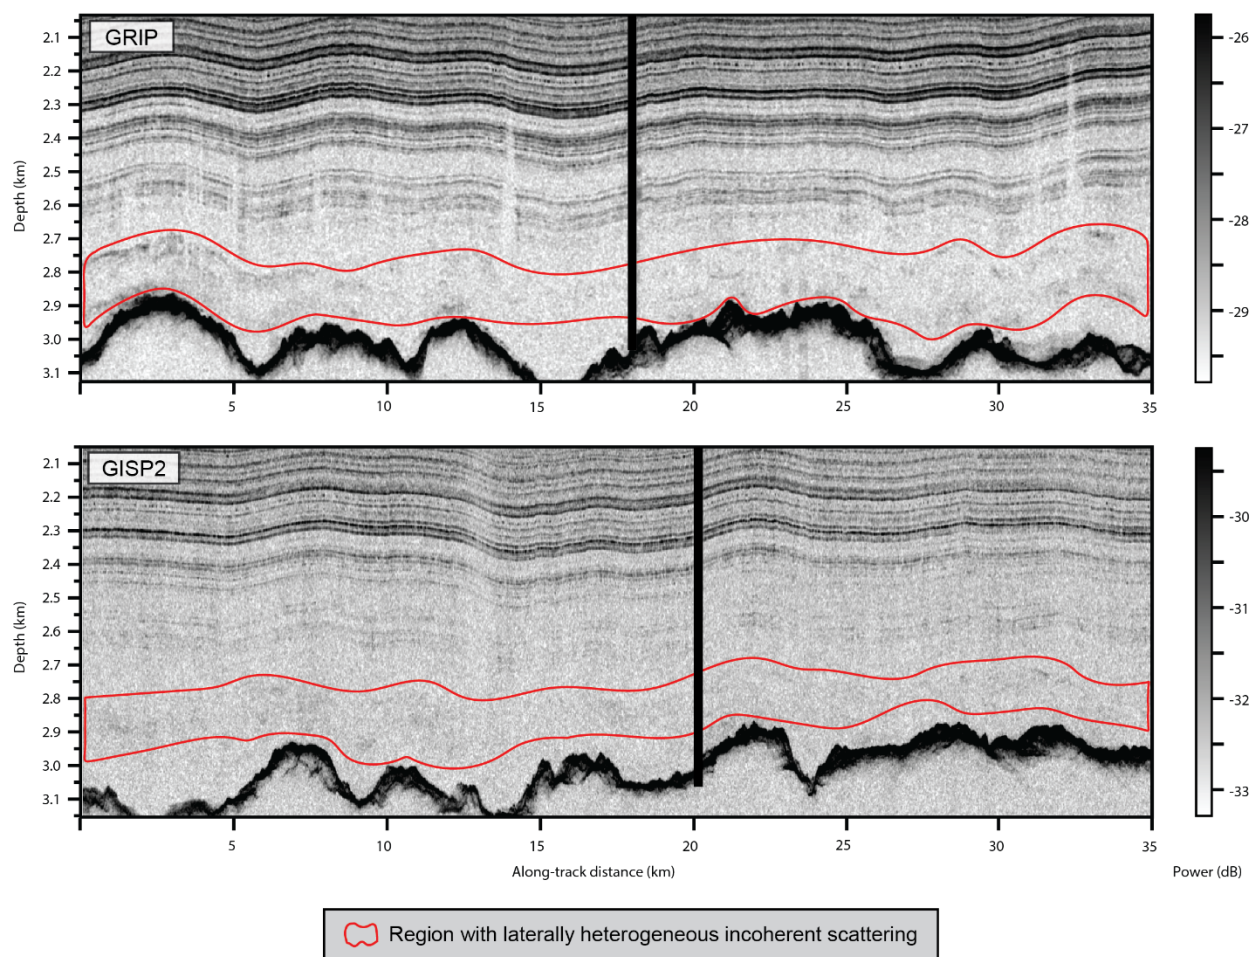

31 **Figure S4: 35 km length radar transects from GRIP and GISP2. Areas of laterally heterogeneous incoherent scattering**  
32 **are outlined in red. Black vertical line depicts location of ice core. The region of laterally heterogeneous incoherent**  
33 **scattering is coincident with the approximate depth of the disturbed climate records at GRIP and GISP2.**

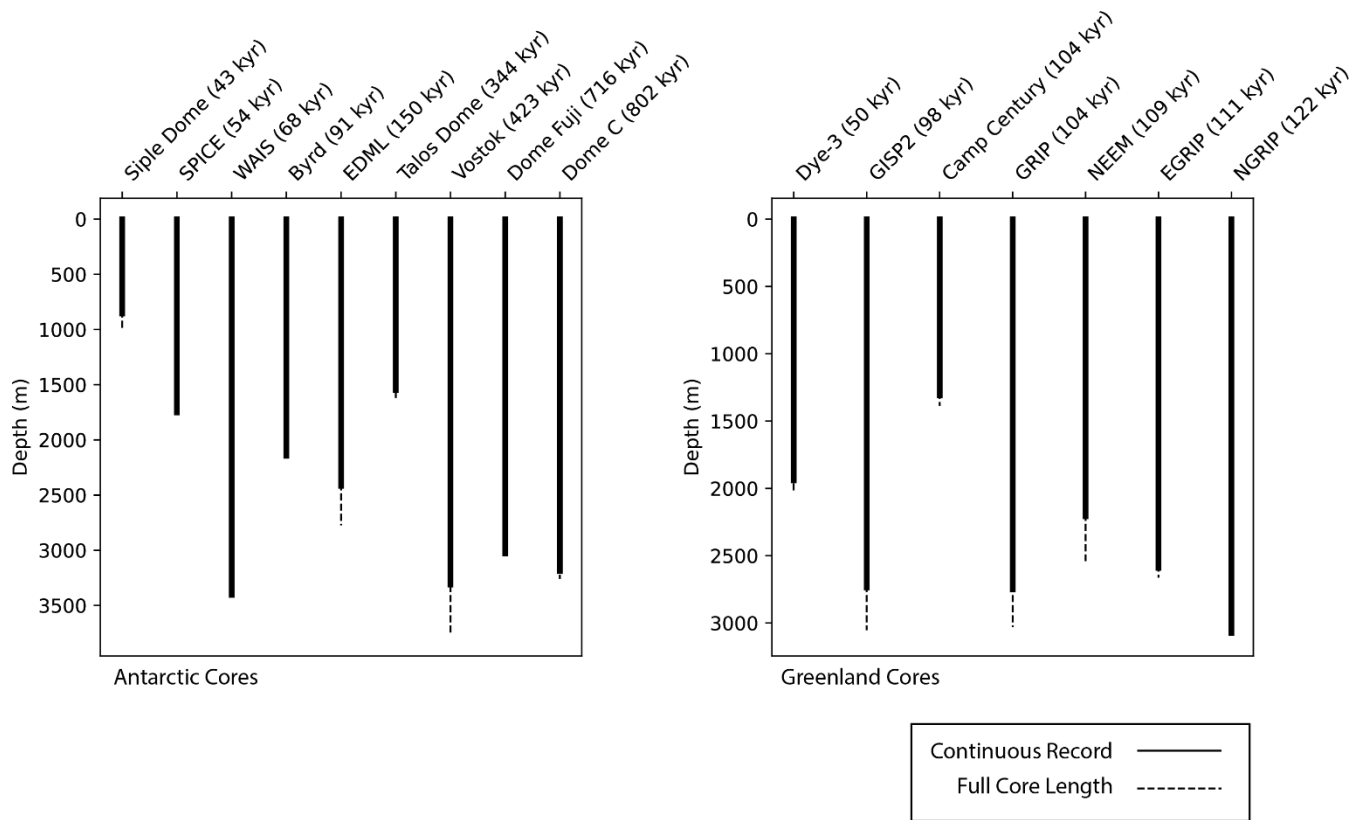

**Figure S5: Plot indicating depth range associated with a continuous climate record for ice cores in Greenland and Antarctica. Ice cores are sorted in order of age, considering only the continuous part of the record.**



## 39      **References in Supplementary Material**

- 40      Ahn, J. and Brook, E. J.: Atmospheric CO<sub>2</sub> and climate on millennial time scales during the Last Glacial Period, *Science*, 322,  
41      83–85, <https://doi.org/10.1126/science.1160832>, 2008.
- 42      Alley, R. B., Gow, A. J., Johnsen, S. J., Kipfstuhl, J., Meese, D. A., and Thorsteinsson, T.: Comparison of deep ice cores,  
43      *Nature*, 373, 393–394, <https://doi.org/10.1038/373393b0>, 1995.
- 44      Alley, R. B., Gow, A. J., Meese, D. A., Fitzpatrick, J. J., Waddington, E. D., and Bolzan, J. F.: Grain-scale processes, folding,  
45      and stratigraphic disturbance in the GISP2 ice core, *J. Geophys. Res. Oceans*, 102, 26819–26830,  
46      <https://doi.org/10.1029/96JC03836>, 1997.
- 47      Blankenship, D.D., Morse, D. L., Finn, C. A., Bell, R. E., Peter, M. E., Kempf S. D., Hodge, S. M., Studinger, M., Behrendt,  
48      J. C., and Brozena, J. M.: Geologic controls on the initiation of rapid basal motion for the ice streams of the Southeastern Ross  
49      Embayment: a geophysical perspective including new airborne radar sounding and laser altimetry measurements, in: *The West*  
50      *Antarctic Ice Sheet: Behavior and Environment*, edited by Alley, R. B., and Bindshadler, R. A., *Antarct. Res. Ser.*, 77, Amer.  
51      Geophys. Union, Washington, DC, 105-121, 2001.
- 52      Brook, E. J., White, J. W. C., Schilla, A. S. M., Bender, M. L., Barnett, B., Severinghaus, J. P., Taylor, K. C., Alley, R. B.,  
53      and Steig, E. J.: Timing of millennial-scale climate change at Siple Dome, West Antarctica, during the last glacial period,  
54      *Quat. Sci. Rev.*, 24, 1333–1343, <https://doi.org/10.1016/j.quascirev.2005.02.002>, 2005.
- 55      Buizert, C., Cuffey, K. M., Severinghaus, J. P., Baggenstos, D., Fudge, T. J., Steig, E. J., Markle, B. R., Winstrup, M., Rhodes,  
56      R. H., Brook, E. J., Sowers, T. A., Clow, G. D., Cheng, H., Edwards, R. L., Sigl, M., McConnell, J. R., and Taylor, K. C.: The  
57      WAIS Divide deep ice core WD2014 chronology – Part 1: Methane synchronization (68–31 ka BP) and the gas age–ice age  
58      difference, *Clim. Past*, 11, 153–173, <https://doi.org/10.5194/cp-11-153-2015>, 2015.
- 59      Buizert, C., Sower, T. A., Niezgod, K., Blunier, T., Gkinis, V., Harlan, M., He, C., Jones, T., Kjaer, H., Liisberg, J., Menking,  
60      J., Morris, V., Noone, D., Rasmussen, S. O., Sime, L. C., Steffensen, J. P., Svensson, A., Vaughn B., Vinther, B. M., White,  
61      J. W. C.: The Greenland spatial fingerprint of Dansgaard-Oeschger events in observations and models, *Proc. Natl. Acad. Sci.*,  
62      121 (44), <https://doi.org/10.1073/pnas.2402637121>, 2024.
- 63      Capron, E., Landais, A., Lemieux-Dudon, B., Schilt, A., Masson-Delmotte, V., Buiron, D., Chappellaz, J., Dahl-Jensen, D.,  
64      Johnsen, S., Leuenberger, M., Louergue, L., and Oerter, H.: Synchronising EDML and NorthGRIP ice cores using  $\delta^{18}\text{O}$  of  
65      atmospheric oxygen ( $\delta^{18}\text{O}_{\text{atm}}$ ) and CH<sub>4</sub> measurements over MIS5 (80–123 kyr), *Quat. Sci. Rev.*, 29, 222–234,  
66      <https://doi.org/10.1016/j.quascirev.2009.07.014>, 2010.
- 67      Casey, K. A., Fudge, T. J., Neumann, T. A., Steig, E. J., Cavitte, M. G. P., and Blankenship, D. D.: The 1500 m South Pole  
68      ice core: recovering a 40 ka environmental record, *Ann. Glaciol.*, 55, 137–146, <https://doi.org/10.3189/2014AoG68A016>,  
69      2014.
- 70      CRISIS: Radar Depth Sounder Data [data set], 2024.
- 71      Dahl-Jensen, D., Gundestrup, N. S., Miller, H., Watanabe, O., Johnsen, S. J., Steffensen, J. P., Clausen, H. B., Svensson, A.,  
72      and Larsen, L. B.: The NorthGRIP deep drilling programme, *Ann. Glaciol.*, 35, 1–4,  
73      <https://doi.org/10.3189/172756402781817275>, 2002.
- 74      Dansgaard, W.: A New Greenland Deep Ice Core, *Science*, 218, 1273–1277, 1982.

75 Dome Fuji Ice Core Project Members: State dependence of climatic instability over the past 720,000 years from Antarctic ice  
76 cores and climate modeling, *Sci. Adv.*, 3, <https://doi.org/10.1126/sciadv.1600446>, 2017.

77 Durand, G., Svensson, A., Persson, A., Gillet-Chaulc, F., Montagnat, M., and Dahl-Jensen, D.: Evolution of the texture along  
78 the EPICA Dome C ice core, *Low Temperature Science Supplement Issue: Physics of Ice Core Records II*, 68, 91–105, 2009.

79 Eichler, J.: C-axis analysis of the NEEM ice core, Master’s Thesis, Freie Universitat, Berlin, Germany, 63 pp., 2013.

80 Eisen, O., Hamann, I., Kipfstuhl, S., Steinhage, D., and Wilhelms, F.: Direct evidence for continuous radar reflector originating  
81 from changes in crystal-orientation fabric, *The Cryosphere*, 1, 1–10, <https://doi.org/10.5194/tc-1-1-2007>, 2007.

82 Engelhardt, H.: Ice temperature and high geothermal flux at Siple Dome, West Antarctica, from borehole measurements, *J.*  
83 *Glaciol.*, 50, 251–256, <https://doi.org/10.3189/172756504781830105>, 2004.

84 EPICA community members: Eight glacial cycles from an Antarctic ice core, *Nature*, 429, 623–628,  
85 <https://doi.org/10.1038/nature02599>, 2004.

86 Epifanio, J. A., Brook, E. J., Buizert, C., Edwards, J. S., Sowers, T. A., Kahle, E. C., Severinghaus, J. P., Steig, E. J., Winski,  
87 D. A., Osterberg, E. C., Fudge, T. J., Aydin, M., Hood, E., Kalk, M., Kreutz, K. J., Ferris, D. G., and Kennedy, J. A.: The SP19  
88 chronology for the South Pole Ice Core – Part 2: gas chronology,  $\Delta$ age, and smoothing of atmospheric records, *Clim. Past*, 16,  
89 2431–2444, <https://doi.org/10.5194/cp-16-2431-2020>, 2020.

90 Faria, S. H., Freitag, J., and Kipfstuhl, S.: Polar ice structure and the integrity of ice-core paleoclimate records, *Quat. Sci. Rev.*,  
91 29, 338–351, <https://doi.org/10.1016/j.quascirev.2009.10.016>, 2010.

92 Faria, S. H., Kipfstuhl, S., and Lambrecht, A.: The EPICA-DML Deep Ice Core: A Visual Record, Springer Berlin Heidelberg,  
93 Berlin, Heidelberg, 305 pp., <https://doi.org/10.1007/978-3-662-55308-4>, 2018.

94 Fegyveresi, J. M., Fudge, T. J., Ferris, D. G., Winski, D. A., and Alley, R. B.: Visual observations and stratigraphy of the  
95 South Pole Ice Core (SPICEcore): a preliminary Holocene (~10.2 ka) accumulation record and depth-age chronology, *Cold*  
96 *Regions Research and Engineering Laboratory*, 2019.

97 Ferraccioli, F., Forsberg, R., Matsuoka, K., Olesen, A. V., Jordan, T., Corr, H., Robinson, C., and Kohler, J.: Processed  
98 Airborne Radio-Echo Sounding Data from the POLARGAP Survey Covering the South Pole, and Foundation and Recovery  
99 Glaciers, East Antarctica [data set], <https://doi.org/10.5285/e8a29fa7-a245-4a04-8b56-098defa134b9>, 2021a.

100 Ferraccioli, F., Corr, H., Jordan, T., Robinson, C., Armadillo, E., Bozzo, E., and Caneva, G.: Processed Airborne Radio-Echo  
101 Sounding Data from the WISE-ISODYN Survey Across the Wilkes Subglacial Basin, East Antarctica (2005/2006) [data set],  
102 <https://doi.org/10.5285/70adab3d-3632-400d-9aa1-ddf2d62a11b3>, 2021b.

103 Fitzpatrick, J. J., Voigt, D. E., Fegyveresi, J. M., Stevens, N. T., Spencer, M. K., Cole-Dai, J., Alley, R. B., Jardine, G. E.,  
104 Cravens, E. D., Wilen, L. A., Fudge, T. J., and McConnell, J. R.: Physical properties of the WAIS Divide ice core, *J. Glaciol.*,  
105 60, 1181–1198, <https://doi.org/10.3189/2014JoG14J100>, 2014.

106 Fudge, T. J., Taylor, K. C., Waddington, E. D., Fitzpatrick, J. J., and Conway, H.: Electrical stratigraphy of the WAIS Divide  
107 ice core: identification of centimeter-scale irregular layering, *J. Geophys. Res. Earth Surf.*, 121, 1218–1229,  
108 <https://doi.org/10.1002/2016JF003845>, 2016.

109 Gow, A. J. and Meese, D.: Physical properties, crystalline textures and c-axis fabrics of the Siple Dome (Antarctica) ice core,  
110 *J. Glaciol.*, 53, 573–584, <https://doi.org/10.3189/002214307784409252>, 2007.

111 Gow, A. J. and Meese, D. A.: The Physical and Structural Properties of the Siple Dome Ice Cores [data set],  
 112 <https://doi.org/10.7265/N5668B34>, 2003.

113 Gow, A. J. and Williamson, T.: Rheological implications of the internal structure and crystal fabrics of the West Antarctic ice  
 114 sheet as revealed by deep core drilling at Byrd Station, *Geol Soc America Bull*, 87, 1665, [https://doi.org/10.1130/0016-](https://doi.org/10.1130/0016-7606(1976)87<1665:RIOTIS>2.0.CO;2)  
 115 [7606\(1976\)87<1665:RIOTIS>2.0.CO;2](https://doi.org/10.1130/0016-7606(1976)87<1665:RIOTIS>2.0.CO;2), 1976.

116 Gow, A. J., Ueda, H. T., and Garfield, D. E.: Antarctic ice sheet: preliminary results of first core hole to bedrock, *Science*,  
 117 161, 1011–1013, <https://doi.org/10.1126/science.161.3845.1011>, 1968.

118 Gow, A. J., Epstein, S., and Sheehy, W.: On the origin of stratified debris in ice cores from the bottom of the Antarctic Ice  
 119 Sheet, *J. Glaciol.*, 23, 185–192, <https://doi.org/10.3189/S0022143000029828>, 1979.

120 Gow, A. J., Meese, D. A., Alley, R. B., Fitzpatrick, J. J., Anandakrishnan, S., Woods, G. A., and Elder, B. C.: Physical and  
 121 structural properties of the Greenland Ice Sheet Project 2 ice core: A review, *J. Geophys. Res.*, 102, 26559–26575,  
 122 <https://doi.org/10.1029/97JC00165>, 1997.

123 Grootes, P. M., Stulver, M., White, J. W. C., Johnsen, S., and Jouzel, J.: Comparison of oxygen isotope records from the GISP2  
 124 and GRIP Greenland ice cores, *Nature*, 366, 552–554, <https://doi.org/10.1038/366552a0>, 1993.

125 Hansen, B. L. and Langway, C. C.: Deep core drilling in ice and core analysis at Camp Century, Greenland, 1961–1966,  
 126 *Antarct. J.*, 126, 207–208, 1966.

127 Herron, S. L. and Langway, C. C.: A Comparison of Ice Fabrics and Textures at Camp Century, Greenland and Byrd Station,  
 128 *Antarctica*, *Annals of Glaciology*, 3, 118–124, <https://doi.org/10.3189/S0260305500002639>, 1982.

129 Herron, S. L., Langway Jr., C. C., and Brugger, K. A.: Ultrasonic Velocities and Crystalline Anisotropy in the Ice Core from  
 130 Dye 3, Greenland, in: *Greenland Ice Core: Geophysics, Geochemistry, and the Environment*, American Geophysical Union  
 131 (AGU), 23–31, <https://doi.org/10.1029/GM033p0023>, 1985.

132 Hodge, S. M., Wright, D. L., Bradley, J. A., Jacobel, R. W., Skou, N., and Vaughn, B.: Determination of the surface and bed  
 133 topography in central Greenland, *J. Glaciol.*, 36, 17–30, <https://doi.org/10.3189/S0022143000005505>, 1990.

134 Hvidberg, C. S., Grinsted, A., Dahl-Jensen, D., Khan, S. A., Kusk, A., Andersen, J. K., Neckel, N., Solgaard, A., Karlsson, N.  
 135 B., Kjær, H. A., and Vallengaard, P.: Surface velocity of the Northeast Greenland Ice Stream (NEGIS): assessment of interior  
 136 velocities derived from satellite data by GPS, *The Cryosphere*, 14, 3487–3502, <https://doi.org/10.5194/tc-14-3487-2020>, 2020.

137 Jansen, D., Llorens, M.-G., Westhoff, J., Steinbach, F., Kipfstuhl, S., Bons, P., Griera, A., and Weikusat, I.: Small-scale  
 138 disturbances in the stratigraphy of the NEEM ice core: observations and numerical model simulations, *The Cryosphere*  
 139 *Discussions*, 9, <https://doi.org/10.5194/tcd-9-5817-2015>, 2015.

140 Johnsen, S. J., Clausen, H. B., Dansgaard, W., Fuhrer, K., Gundestrup, N., Hammer, C. U., Iversen, P., Jouzel, J., Stauffer, B.,  
 141 and Steffensen, J. P.: Irregular glacial interstadials recorded in a new Greenland ice core, *Nature*, 359, 311–313,  
 142 <https://doi.org/10.1038/359311a0>, 1992.

143 Johnsen, S. J., Dahl-Jensen, D., Gundestrup, N., Steffensen, J. P., Clausen, H. B., Miller, H., Masson-Delmotte, V.,  
 144 Sveinbjörnsdóttir, A. E., and White, J.: Oxygen isotope and palaeotemperature records from six Greenland ice-core stations:  
 145 Camp Century, Dye-3, GRIP, GISP2, Renland and NorthGRIP, *J. Quat. Sci.*, 16, 299–307, <https://doi.org/10.1002/jqs.622>,  
 146 2001.



147 Jouzel, J., Masson-Delmotte, V., Cattani, O., Dreyfus, G., Falourd, S., Hoffmann, G., Minster, B., Nouet, J., Barnola, J. M.,  
148 Chappellaz, J., Fischer, H., Gallet, J. C., Johnsen, S., Leuenberger, M., Loulergue, L., Luethi, D., Oerter, H., Parrenin, F.,  
149 Raisbeck, G., Raynaud, D., Schilt, A., Schwander, J., Selmo, E., Souchez, R., Spahni, R., Stauffer, B., Steffensen, J. P., Stenni,  
150 B., Stocker, T. F., Tison, J. L., Werner, M., and Wolff, E. W.: Orbital and millennial Antarctic climate variability over the past  
151 800,000 years, *Science*, 317, 793–796, <https://doi.org/10.1126/science.1141038>, 2007.

152 Langway, C. C., Oeschger, H., and Dansgaard, W.: *Greenland Ice Core: Geophysics, Geochemistry, and the Environment*,  
153 American Geophysical Union, 127 pp., 1985.

154 Langway, C. C., Shoji, H., and Azuma, N.: Crystal size and orientation patterns in the Wisconsin-age ice from Dye 3,  
155 Greenland, *Ann. Glaciol.*, 10, 109–115, <https://doi.org/10.3189/S0260305500004262>, 1988.

156 Lilien, D. A., Steinhage, D., Taylor, D., Parrenin, F., Ritz, C., Mulvaney, R., Martín, C., Yan, J.-B., O'Neill, C., Frezzotti, M.,  
157 Miller, H., Gogineni, P., Dahl-Jensen, D., and Eisen, O.: Brief communication: New radar constraints support presence of ice  
158 older than 1.5 Myr at Little Dome C, *The Cryosphere*, 15, 1881–1888, <https://doi.org/10.5194/tc-15-1881-2021>, 2021.

159 Loulergue, L., Schilt, A., Spahni, R., Masson-Delmotte, V., Blunier, T., Lemieux, B., Barnola, J.-M., Raynaud, D., Stocker,  
160 T. F., and Chappellaz, J.: Orbital and millennial-scale features of atmospheric CH<sub>4</sub> over the past 800,000 years, *Nature*, 453,  
161 383–386, <https://doi.org/10.1038/nature06950>, 2008.

162 Montagnat, M., Buiron, D., Arnaud, L., Broquet, A., Schlitz, P., Jacob, R., and Kipfstuhl, S.: Measurements and numerical  
163 simulation of fabric evolution along the Talos Dome ice core, *Antarctica, Earth and Planetary Science Letters*, 357–358, 168–  
164 178, <https://doi.org/10.1016/j.epsl.2012.09.025>, 2012.

165 Montagnat, M., Azuma, N., Dahl-Jensen, D., Eichler, J., Fujita, S., Gillet-Chaulet, F., Kipfstuhl, S., Samyn, D., Svensson, A.,  
166 and Weikusat, I.: Fabric along the NEEM ice core, Greenland, and its comparison with GRIP and NGRIP ice cores, *The*  
167 *Cryosphere*, 8, 1129–1138, <https://doi.org/10.5194/tc-8-1129-2014>, 2014.

168 Morrison, M.: First GISP2 field season just completed, *Eos, Transactions American Geophysical Union*, 70, 1449–1449,  
169 <https://doi.org/10.1029/89EO00336>, 1989.

170 Narcisi, B., Petit, J. R., and Langone, A.: Last glacial tephra layers in the Talos Dome ice core (peripheral East Antarctic  
171 Plateau), with implications for chronostratigraphic correlations and regional volcanic history, *Quat. Sci. Rev.*, 165, 111–126,  
172 <https://doi.org/10.1016/j.quascirev.2017.04.025>, 2017.

173 NEEM Community Members: Eemian interglacial reconstructed from a Greenland folded ice core, *Nature*, 493, 489–494,  
174 <https://doi.org/10.1038/nature11789>, 2013.

175 Nixdorf, U., Steinhage, D., Meyer, U., Hempel, L., Jenett, M., Wachs, P., and Miller, H.: The newly developed airborne radio-  
176 echo sounding system of the AWI as a glaciological tool, *Ann. Glaciol.*, 29, 231–238,  
177 <https://doi.org/10.3189/172756499781821346>, 1999.

178 North Greenland Ice Core Project Members: High-resolution record of Northern Hemisphere climate extending into the last  
179 interglacial period, *Nature*, 431, 147–151, <https://doi.org/10.1038/nature02805>, 2004.

180 Petit, J. R., Jouzel, J., Raynaud, D., Barkov, N. I., Delaygue, G., Delmotte, M., Kotlyakov, V. M., Legrand, M., Lipenkov, V.  
181 Y., Lorius, C., and Saltzman, E.: Climate and atmospheric history of the past 420,000 years from the Vostok ice core,  
182 *Antarctica, Nature*, 399, 1999.

183 Souchez, R., Petit, J. R., Jouzel, J., Simões, J., De Angelis, M., Barkov, N., Stievenard, M., Vimeux, F., Sleewaegen, J., and  
184 Lorrain, R.: Highly deformed basal ice in the Vostok core, Antarctica, *Geophys. Res. Lett.*, 29,  
185 <https://doi.org/10.1029/2001GL014192>, 2002.

186 Steinhage, D., Kipfstuhl, S., Nixdorf, U., and Miller, H.: Internal structure of the ice sheet between Kohnen station and Dome  
187 Fuji, Antarctica, revealed by airborne radio-echo sounding, *Ann. Glaciol.*, 54, 163–167,  
188 <https://doi.org/10.3189/2013AoG64A113>, 2013.

189 Svensson, A.: Visual stratigraphy of the North Greenland Ice Core Project (NorthGRIP) ice core during the last glacial period,  
190 *J. Geophys. Res.*, 110, <https://doi.org/10.1029/2004JD005134>, 2005.

191 Tison, J.-L., de Angelis, M., Littot, G., Wolff, E., Fischer, H., Hansson, M., Bigler, M., Udisti, R., Wegner, A., Jouzel, J.,  
192 Stenni, B., Johnsen, S., Masson-Delmotte, V., Landais, A., Lipenkov, V., Loulergue, L., Barnola, J.-M., Petit, J.-R., Delmonte,  
193 B., Dreyfus, G., Dahl-Jensen, D., Durand, G., Bereiter, B., Schilt, A., Spahni, R., Pol, K., Lorrain, R., Souchez, R., and Samyn,  
194 D.: Retrieving the paleoclimatic signal from the deeper part of the EPICA Dome C ice core, *The Cryosphere*, 9, 1633–1648,  
195 <https://doi.org/10.5194/tc-9-1633-2015>, 2015.

196 Urbini, S., Cafarella, L., Zirizzotti, A., Bianchi, C., Tabacco, I., and Frezzotti, M.: Location of a new ice core site at Talos  
197 Dome (East Antarctica), *Annals of Geophysics*, 49, <https://doi.org/10.4401/ag-3104>, 2006.

198 Vasiliev, N. I., Talalay, P. G., Bobin, N. E., Chistyakov, V. K., Zubkov, V. M., Krasilev, A. V., Dmitriev, A. N., Yankilevich,  
199 S. V., and Lipenkov, V. Y.: Deep drilling at Vostok station, Antarctica: history and recent events, *Ann. Glaciol.*, 47, 10–23,  
200 <https://doi.org/10.3189/172756407786857776>, 2007.

201 Verbeke, V., Lorrain, R., Johnsen, S. J., and Tison, J.-L.: A multiple-step deformation history of basal ice from the Dye 3  
202 (Greenland) core: new insights from the CO<sub>2</sub> and CH<sub>4</sub> content, *Ann. Glaciol.*, 35, 231–236,  
203 <https://doi.org/10.3189/172756402781817248>, 2002.

204 Voigt, D. E.: C-axis Fabric of the South Pole Ice Core, SPC14 [data set], <https://doi.org/10.15784/601057>, 2017.

205 WAIS Divide Project Members: Onset of deglacial warming in West Antarctica driven by local orbital forcing, *Nature*, 500,  
206 440–444, <https://doi.org/10.1038/nature12376>, 2013.

207 Wang, Y., Thorsteinsson, T., Kipfstuhl, J., Miller, H., Dahl-Jensen, D., and Shoji, H.: A vertical girdle fabric in the NorthGRIP  
208 deep ice core, North Greenland, *Ann. Glaciol.*, 35, 515–520, <https://doi.org/10.3189/172756402781817301>, 2002.

209 Wang, Z., Chung, A., Steinhage, D., Parrenin, F., Freitag, J., and Eisen, O.: Mapping age and basal conditions of ice in the  
210 Dome Fuji region, Antarctica, by combining radar internal layer stratigraphy and flow modeling, *The Cryosphere*, 17, 4297–  
211 4314, <https://doi.org/10.5194/tc-17-4297-2023>, 2023.

212 Weikusat, I., Kipfstuhl, S., and Lambrecht, A.: Crystal c-axes (Fabric G20) of Ice Core Samples Collected from the EDML  
213 Ice Core with Links to Raw Data Files [data set], <https://doi.org/10.1594/PANGAEA.807207>, 2013.

214 Wright, D. L., Bradley, J. A., and Hodge, S. M.: Use of a new high-speed digital data acquisition system in airborne ice-  
215 sounding, *IEEE Trans. Geosci. Remote Sensing*, 27, 561–567, <https://doi.org/10.1109/TGRS.1989.35938>, 1989.
