# Supplementary material for: Advancing interpretation of incoherent scattering in ice-penetrating radar data used for ice core site selection
Source: Copernicus journal article supplement (doi:10.5194/tc-19-3159-2025), 2025-08-21
Supplement: Supplementary file 2 [file Table S1.xlsx]

## Sheet: Sheet1
Table S1: Radar Image Metadata
Supporting Manuscript: Advancing interpretation of incoherent scattering in ice penetrating radar data used for ice core site selection
Authors: Ellen Mutter and Nicholas Holschuh
The table below contains metadata for the radar images presented in Figures 2, 4, 5a, and 5b of the main text of this work as well as Supplementary Figures 1-4.
Ice Core	Figure	Core Coordinates Source	Core Lat	Core Lon	Survey Date	Distance from Core Site (m)	Angle relative to Ice Flow Dir (o)	File Name	Trace Index	Radar System	Center Freq. (MHz)	Bandwidth (MHz)	Effective Range Resolution (m)	Radar System Reference
GREENLAND
Camp Century	Dict. only	(Hansen and Langway, 1966)	77°10’53”N	61°08’33”W	2014-05-01	734	162	20140501_01_006	[1476:2153]	CReSIS MCoRDS 3 on P3	195	30	2.8	CReSIS. 2024. 2014 Greenland P3 Data.
Camp Century	5b	(Hansen and Langway, 1966)	77°10’53”N	61°08’33”W	2014-05-07	3397	140	20140507_01_066	[2789:3332]	CReSIS MCoRDS 3 on P3	195	30	2.8	CReSIS. 2024. 2014 Greenland P3 Data.
DYE-3	5a	(Langway et al., 1985)	65°11’N	43°49’W	2014-04-12	2360	140	20140412_02_002	[304:955]	CReSIS MCoRDS 3 on P3	195	30	2.8	CReSIS. 2024. 2014 Greenland P3 Data.
DYE-3	Dict. only	(Langway et al., 1985)	65°11’N	43°49’W	2014-04-12	361	68	20140412_01_009	[879:1538]	CReSIS MCoRDS 3 on P3	195	30	2.8	CReSIS. 2024. 2014 Greenland P3 Data.
EastGRIP	S4	(Hvidberg et al., 2020)	75°38’ N	35°60’ W	2014-05-15	1640	8	20140515_02_043 - 044	[2448:3117]	CReSIS MCoRDS 3 on P3	195	30	2.8	CReSIS. 2024. 2014 Greenland P3 Data.
EastGRIP	4, 5b, S4	(Hvidberg et al., 2020)	75°38’ N	35°60’ W	2014-05-15	557	81	20140515_02_041 - 042	[2308:2987]	CReSIS MCoRDS 3 on P3	195	30	2.8	CReSIS. 2024. 2014 Greenland P3 Data.
GISP2	Dict. only	(Morrison, 1989)	72°34.79’ N	38°27.11’ W	2007-09-17	227	7	20070917_01_010	[1247:1912]	CReSIS MCoRDS 3 on P3	195	30	2.8	CReSIS. 2024. 2007 Greenland P3 Data.
GISP2	4, 5b, S3	(Morrison, 1989)	72°34.79’ N	38°27.11’ W	2014-04-10	1636	105	20140410_01_038 - 039	[2833:3512]	CReSIS MCoRDS 3 on P3	195	30	2.8	CReSIS. 2024. 2014 Greenland P3 Data.
GRIP	4, 5b, S3	(Johnsen et al., 1992)	72°34’N	37°37’W	2012-04-11	1378	156	20120411_02_051	[507:842]	CReSIS MCoRDS 3 on P3	195	30	2.8	CReSIS. 2024. 2012 Greenland P3 Data.
GRIP	Dict. only	(Johnsen et al., 1992)	72°34’N	37°37’W	2002-05-30	2204	63	20020530_01_013	[451:516]	CReSIS ICORDS 2	158.5	17	5	CReSIS. 2024. 2002 Greenland P3 Data.
GRIP	2c	(Johnsen et al., 1992)	72°34’N	37°37’W	1987	1937	131	N375	[131:925]	TUD 60 MHz	60	~1.7*	~50*	Wright et al., 1989; Hodge et al., 1990
GRIP	2c	(Johnsen et al., 1992)	72°34’N	37°37’W	2022-05-29	1207	153	20020529_01_009	[312:908]	CReSIS ICORDS 2	158.5	17	5	CReSIS. 2024. 2002 Greenland P3 Data.
NEEM	S1	(NEEM Community Members, 2013)	77.45°N	51.06°W	2011-05-06	365	10	20110506_02_007 - 008	[4228:4963]	CReSIS MCoRDS 2 on P3	195	30	2.8	CReSIS. 2024. 2011 Greenland P3 Data.
NEEM	4, 5b	(NEEM Community Members, 2013)	77.45°N	51.06°W	2008-08-12	473	101	20080812_03_013	[76:579]	CReSIS Ground MCRDS at NEEM	150	30	2.8	CReSIS. 2024. 2008 Greenland Ground Data.
NEEM	Dict only	(NEEM Community Members, 2013)	77.45°N	51.06°W	2008-08-12	303	169	20080812_03_003	[176:399]	CReSIS Ground MCRDS at NEEM	150	30	2.8	CReSIS. 2024. 2008 Greenland Ground Data.
NorthGRIP	4, 5b	(Dahl-Jensen et al., 2002)	75.10°N	42.32°W	2014-05-02	2075	13	20140502_01_047	[2096:2771]	CReSIS MCoRDS 3 on P3	195	30	2.8	CReSIS. 2024. 2014 Greenland P3 Data.
ANTARCTICA
Byrd	5a	(Gow et al., 1968)	80°01’ S	119°31’ W	2010-01-16	3284	9	20100116_02_011	[973:1528]	CReSIS MCoRDS 3 on P3	193.9	9.5	8.9	CReSIS. 2024. 2010 Antarctica DC8 Data.
Byrd	Dict. only	(Gow et al., 1968)	80°01’ S	119°31’ W	2010-01-08	932	63	20100108_02_014	[1280:1845]	CReSIS MCoRDS 3 on P3	193.9	9.5	8.9	CReSIS. 2024. 2010 Antarctica DC8 Data.
Dome C	Dict. only	(Faria et al., 2018)	75°06’04” S	123°20’52” E	2013-11-27	2782	160	20131127_01_028-29	[1339:1679]	CReSIS MCoRDS 3 on P3	195	30	2.8	CReSIS. 2024. 2013 Antarctica P3 Data.
Dome C	4, 5b	(Faria et al., 2018)	75°06’04” S	123°20’52” E	2019-12-01	1030	28	ldc_to_edc	[0:1023]	BELDC VHF Radar from U Alabama (Yan et al., 2020)	200	60	1.4	Lilien et al., 2021
Dome Fuji	Dict. only	(DomeF Ice Core Project Members, 2017)	77°19’01” S	39°42’12” E	2002-03-01	111	76	AWI_Kohnen-Dome_Fuji_stp10	[519:636]	2002 AWI RES System on Polar2	150	20	4.2	Steinhage et al., 2013; Nixdorf et al., 1999
Dome Fuji	4, 5b, S2	(DomeF Ice Core Project Members, 2017)	77°19’01” S	39°42’12” E	2018-12-01	52	163	20190102_02_001	[7399:9078]	CReSIS_Ground	200	60	1.4	Wang et al., 2023
EDML	4, 5a	(Faria et al., 2018)	75°00’06” S	00°04’04” E	2002-03-01	100	39	AWI_Kohnen-Dome_Fuji_stp10	[218:346]	2002 AWI RES System on Polar2	150	20	4.2	Steinhage et al., 2013; Nixdorf et al., 1999
Siple	4, 5a	(Englehardt, 2004)	81.658° S	148.809° W	2013-12-20	3255	116	20131220_04_002	[2184:2875]	CReSIS MCoRDS 4 on Polar6	325	250	0.3	CReSIS. 2024. 2013 Antarctica Basler Data.
SPICE	5a	(Casey et al., 2014; Fegyveresi et al., 2019)	89.99° S	98.16° W	2016-01-13	519	99	P34	[579:880]	PolarGap PASIN on TO	150	12	7	Ferraccioli, F., et al., 2021a
Talos Dome	5a	(Urbini et al., 2006)	72°49’40” S	159°11’00” E	2005/2006	6	117	W18	[254:861]	WISE-ISODYNE PASIN	150	10	8.4	Ferraccioli, F., et al., 2021b
Talos Dome	Dict. only	(Urbini et al., 2006)	72°49’40” S	159°11’00” E	2005/2006	952	47	W31	[27119:27534]	WISE-ISODYNE PASIN	150	10	8.4	Ferraccioli, F., et al., 2021b
Vostok	4, 5b	(Vasiliev et al., 2007)	78°28’S	106°48’E	2013-11-27	855	17	20131127_01_045 - 046	[1403:2703]	CReSIS MCoRDS 3 on P3	195	30	2.8	CReSIS. 2024. 2013 Antarctica P3 Data.
Vostok	Dict. only	(Vasiliev et al., 2007)	78°28’S	106°48’E	2000-12-01	1640	8	CCx-X06a	[6415:7731]	SOAR at UTIG	60	n/a	20	Blankenship et al., 2001
WAIS	5a	(WAIS Divide Project Members, 2013)	79°28.058’ S	112°05.189’ W	2006-01-03	972	16	20060103_01_001	[134:499]	CReSIS SAR	210	180	0.5	CReSIS. 2024. 2005 Antarctica Ground Data.
WAIS	Dict. only	(WAIS Divide Project Members, 2013)	79°28.058’ S	112°05.189’ W	2010-01-06	4535	33	2010 Antarctica DC8	[0:584]	MCoRDS on DC8	193.9	9.5	8.9	CReSIS. 2024. 2010 Antarctica DC8 Data.
*Hodge et al., 1990 cite a bandwidth of 4 MHz, but Fourier analysis of radar transect indicates a dominant signal from 1-2 MHz bandwidth, with an ~50m effective range resolution.
