# Supplementary material for: Advancing interpretation of incoherent scattering in ice-penetrating radar data used for ice core site selection
Source: Copernicus journal article supplement (doi:10.5194/tc-19-3159-2025), 2025-08-21
Supplement: Supplementary file 2 [file tc-19-3159-2025-supplement.zip]

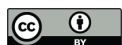

## *Supplement of*

# **Advancing interpretation of incoherent scattering in ice-penetrating radar data used for ice core site selection**

**Ellen Lucinda Mutter and Nicholas Holschuh**

*Correspondence to:* Nicholas Holschuh (nholschuh@amherst.edu)

- tc-19-3159-2025-supplement-title-page.pdf
- SupplementaryInformation.pdf
- Table S1.xlsx
- Table S2.xlsx

The copyright of individual parts of the supplement might differ from the article licence.
